# Supplementary material for: Characteristic infrared intensities of carbonyl stretching vibrations
Source: Royal Society of Chemistry journal article supplement (doi:10.1039/c6cp01035k), 2016-01-01
Supplement: c6cp01035k1.pdf [file c6cp01035k1.pdf]

## Supplementary Information

**Table S1.** Band centers ( $\text{cm}^{-1}$ ), band limits ( $\text{cm}^{-1}$ ) and integrated intensities for the molecules with available spectrum in PNNL database.

| Molecule             | Band center | Band limits | Integral  | Integrated Intensity*            |                      |
|----------------------|-------------|-------------|-----------|----------------------------------|----------------------|
|                      |             |             |           | $\text{atm}^{-1} \text{cm}^{-2}$ | $\text{km mol}^{-1}$ |
| CO                   | 2142        | 2030 – 2245 | 0.0108817 | 250.6                            | 61.7                 |
| F <sub>2</sub> CO    | 1944        | 1850 – 2000 | 0.0732902 | 1687.5                           | 415.4                |
| Cl <sub>2</sub> CO   | 1827        | 1780 – 1890 | 0.0465606 | 1072.1                           | 263.9                |
| HCOOH                | 1776        | 1700 – 1820 | 0.0610520 | 1405.3                           | 345.9                |
| CH <sub>3</sub> COOH | 1790        | 1700 – 1850 | 0.0542142 | 1248.2                           | 307.3                |
| Acetone              | 1740        | 1650 – 1850 | 0.0260469 | 599.7                            | 147.6                |
| Acetaldehyde         | 1745        | 1650 – 1900 | 0.0247776 | 570.5                            | 140.4                |
| Formaldehyde         | 1745        | 1660 – 1820 | 0.0137370 | 316.3                            | 77.9                 |
| Glycolaldehyde       | 1754        | 1650 – 1825 | 0.0227784 | 524.5                            | 129.1                |
| Glyoxal              | 1731        | 1661 – 1808 | 0.0255018 | 587.1                            | 144.5                |
| Methylglyoxal        | 1731        | 1691 – 1773 | 0.0284755 | 654.7                            | 161.2                |
| Diacetyl             | 1729        | 1690 – 1769 | 0.0318350 | 732.4                            | 180.3                |

\* – The two units are shown since ( $\text{atm}^{-1} \text{cm}^{-2}$ ) is preferred by PNNL and ( $\text{km mol}^{-1}$ ) is the most common in outputs of *ab initio* packages like Gaussian, Gamess-UK and CFOUR. The conversion factor between them is 1/4.0623.

**Table S2.** Individual charge, charge transfer and counterpolatization contributions to the carbonyl stretching intensity, at QCISD/cc-pVTZ, in  $\text{km mol}^{-1}$ .

| Molecule                       | C <sup>2</sup> | CT <sup>2</sup> | CP <sup>2</sup> | 2xCxCT  | 2xCxCP | 2xCTxCP | Total |
|--------------------------------|----------------|-----------------|-----------------|---------|--------|---------|-------|
| CO                             | 210.3          | 213.2           | 68.8            | -423.5  | 240.5  | -242.2  | 67.1  |
| F <sub>2</sub> CO              | 611.2          | 444.0           | 301.9           | -1041.9 | 859.1  | -732.2  | 442.2 |
| Cl <sub>2</sub> CO             | 237.8          | 90.6            | 139.6           | -293.6  | 364.3  | -224.8  | 313.9 |
| Br <sub>2</sub> CO             | 183.7          | 25.1            | 79.0            | -135.8  | 240.9  | -89.1   | 303.8 |
| HFCO                           | 330.5          | 265.0           | 244.3           | -571.2  | 475.3  | -483.9  | 260.1 |
| HCICO                          | 209.8          | 148.2           | 110.3           | -270.7  | 302.3  | -176.7  | 323.2 |
| HBrCO                          | 187.1          | 208.8           | 91.5            | -177.3  | 254.2  | -179.4  | 384.8 |
| HCOOH                          | 421.5          | 323.7           | 269.7           | -732.2  | 613.7  | -565.6  | 330.8 |
| H <sub>2</sub> CO <sub>3</sub> | 855.3          | 650.3           | 348.0           | -1491.6 | 1090.9 | -951.1  | 501.9 |
| CH <sub>3</sub> COOH           | 420.1          | 304.7           | 255.7           | -614.0  | 471.3  | -543.7  | 294.1 |
| Acetone                        | 173.6          | 104.1           | 85.1            | -268.8  | 242.9  | -188.1  | 148.8 |
| Acetaldehyde                   | 168.4          | 125.2           | 98.6            | -246.0  | 225.1  | -221.7  | 149.5 |
| Formaldehyde                   | 153.9          | 130.3           | 64.3            | -283.2  | 199.0  | -183.0  | 81.2  |
| Glycolaldehyde                 | 151.0          | 136.7           | 96.2            | -241.0  | 204.8  | -229.3  | 118.4 |
| Glyoxal                        | 331.2          | 358.0           | 188.2           | -647.2  | 455.2  | -517.7  | 167.8 |
| Methylglyoxal                  | 326.4          | 316.4           | 178.6           | -633.8  | 465.0  | -472.7  | 179.9 |
| Diacetyl                       | 327.1          | 305.0           | 182.0           | -630.8  | 484.8  | -464.5  | 203.5 |

**Table S3.** CCTCP contributions to the carbonyl stretching intensity in different levels of theory, in  $\text{km mol}^{-1}$ .

| Molecule             | Method               | Basis set            | C <sup>2</sup> | CTCP <sup>2</sup> | 2xCxCTCP | Total  |       |
|----------------------|----------------------|----------------------|----------------|-------------------|----------|--------|-------|
| CO                   | B3LYP                | cc-pVDZ              | 208.0          | 35.1              | -171.0   | 72.1   |       |
|                      |                      | cc-pVTZ              | 197.7          | 29.4              | -152.5   | 74.6   |       |
|                      |                      | cc-pVQZ <sup>g</sup> | 202.1          | 29.8              | -155.3   | 76.6   |       |
|                      | M06-2X               | cc-pVDZ              | 219.5          | 28.9              | -159.3   | 89.1   |       |
|                      |                      | cc-pVTZ              | 213.7          | 24.7              | -145.4   | 93.0   |       |
|                      |                      | cc-pVQZ <sup>g</sup> | 216.5          | 24.8              | -146.5   | 94.8   |       |
|                      | PBE0                 | cc-pVDZ              | 212.8          | 33.0              | -167.5   | 78.2   |       |
|                      |                      | cc-pVTZ              | 205.7          | 30.4              | -158.2   | 78.0   |       |
|                      |                      | cc-pVQZ <sup>g</sup> | 210.2          | 31.3              | -162.1   | 79.3   |       |
|                      | MP2                  | cc-pVDZ              | 188.2          | 72.0              | -232.8   | 27.4   |       |
|                      |                      | cc-pVTZ              | 191.1          | 67.0              | -226.4   | 31.8   |       |
|                      |                      | cc-pVQZ <sup>g</sup> | 196.5          | 66.6              | -228.8   | 34.3   |       |
|                      | QCISD                | cc-pVDZ              | 203.8          | 40.8              | -182.4   | 62.2   |       |
|                      |                      | cc-pVTZ              | 210.3          | 39.8              | -183.0   | 67.1   |       |
|                      |                      | cc-pVQZ <sup>g</sup> | 216.6          | 40.1              | -186.5   | 70.2   |       |
|                      | Average              |                      |                | 206.2             | 39.6     | -177.2 | 68.6  |
|                      | Standard Deviation   |                      |                | 9.5               | 15.8     | 29.8   | 21.4  |
|                      | H <sub>2</sub> CO    | B3LYP                | cc-pVDZ        | 160.7             | 5.0      | -56.9  | 108.8 |
| cc-pVTZ              |                      |                      | 149.5          | 3.5               | -46.0    | 107.0  |       |
| cc-pVQZ <sup>g</sup> |                      |                      | 164.4          | 5.2               | -58.7    | 111.0  |       |
| M06-2X               |                      | cc-pVDZ              | 175.3          | 6.3               | -66.7    | 114.9  |       |
|                      |                      | cc-pVTZ              | 168.1          | 5.5               | -60.6    | 113.0  |       |
|                      |                      | cc-pVQZ <sup>g</sup> | 185.2          | 7.4               | -74.2    | 118.4  |       |
| PBE0                 |                      | cc-pVDZ              | 166.6          | 5.2               | -58.9    | 112.9  |       |
|                      |                      | cc-pVTZ              | 155.2          | 4.2               | -50.9    | 108.5  |       |
|                      |                      | cc-pVQZ <sup>g</sup> | 169.9          | 6.0               | -64.0    | 111.9  |       |
| MP2                  |                      | cc-pVDZ              | 156.3          | 18.1              | -106.3   | 68.1   |       |
|                      |                      | cc-pVTZ              | 137.6          | 14.8              | -90.3    | 62.1   |       |
|                      |                      | cc-pVQZ <sup>g</sup> | 154.3          | 18.7              | -107.4   | 65.6   |       |
| QCISD                |                      | cc-pVDZ              | 166.9          | 12.9              | -92.6    | 87.1   |       |
|                      |                      | cc-pVTZ              | 153.9          | 11.3              | -83.3    | 81.9   |       |
|                      |                      | cc-pVQZ <sup>g</sup> | 171.7          | 15.0              | -101.4   | 85.3   |       |
| Average              |                      |                      | 162.2          | 9.1               | -73.3    | 98.1   |       |
| Standard Deviation   |                      |                      | 11.9           | 5.5               | 23.1     | 20.8   |       |
| HFCO                 |                      | B3LYP                | cc-pVDZ        | 286.4             | 19.8     | -44.9  | 261.3 |
|                      | cc-pVTZ              |                      | 295.6          | 21.8              | -46.5    | 270.9  |       |
|                      | cc-pVQZ <sup>g</sup> |                      | 302.7          | 23.2              | -46.9    | 279.0  |       |
|                      | M06-2X               | cc-pVDZ              | 311.5          | 18.1              | -35.1    | 294.5  |       |
|                      |                      | cc-pVTZ              | 326.9          | 20.3              | -46.2    | 300.9  |       |
|                      |                      | cc-pVQZ <sup>g</sup> | 333.4          | 23.4              | -50.3    | 306.5  |       |
|                      | PBE0                 | cc-pVDZ              | 297.6          | 19.3              | -39.3    | 277.7  |       |
|                      |                      | cc-pVTZ              | 300.2          | 22.2              | -46.5    | 275.9  |       |
|                      |                      | cc-pVQZ <sup>g</sup> | 318.9          | 25.0              | -58.2    | 285.7  |       |
|                      | MP2                  | cc-pVDZ              | 290.1          | 27.3              | -91.1    | 226.3  |       |
|                      |                      | cc-pVTZ              | 311.3          | 31.2              | -108.8   | 233.7  |       |
|                      |                      | cc-pVQZ <sup>g</sup> | 318.6          | 32.4              | -109.0   | 242.0  |       |
|                      | QCISD                | cc-pVDZ              | 302.8          | 21.3              | -73.5    | 250.7  |       |
|                      |                      | cc-pVTZ              | 330.5          | 25.4              | -95.8    | 260.1  |       |
|                      |                      | cc-pVQZ <sup>g</sup> | 340.5          | 28.2              | -101.2   | 267.6  |       |
|                      | Average              |                      |                | 311.1             | 23.9     | -66.2  | 268.9 |
|                      | Standard Deviation   |                      |                | 16.6              | 4.3      | 27.3   | 23.7  |

**Table S4.** Dynamic CCTCP atomic contributions for carbon and oxygen at QCISD/cc-pVTZ, in  $\text{km mol}^{-1}$ .

| <b>Molecule</b>                    | <b>Atom</b> | <b>C<sup>2</sup></b> | <b>CTCP<sup>2</sup></b> | <b>CxCTCP</b> | <b>CTCPxC</b> | <b>Total</b> |
|------------------------------------|-------------|----------------------|-------------------------|---------------|---------------|--------------|
| <b>CO</b>                          | C           | 120.2                | 22.7                    | -52.3         | -52.3         | 38.4         |
|                                    | O           | 90.1                 | 17.1                    | -39.2         | -39.2         | 28.8         |
| <b>F<sub>2</sub>CO</b>             | C           | 463.8                | 10.1                    | -69.3         | -67.6         | 337.0        |
|                                    | O           | 133.9                | 4.3                     | -20.0         | -28.5         | 89.6         |
| <b>Cl<sub>2</sub>CO</b>            | C           | 149.8                | 4.8                     | 22.3          | 31.7          | 208.6        |
|                                    | O           | 87.9                 | 0.5                     | 13.1          | 3.3           | 104.8        |
| <b>Br<sub>2</sub>CO</b>            | C           | 105.7                | 12.5                    | 30.2          | 43.8          | 192.3        |
|                                    | O           | 78.0                 | 2.5                     | 22.3          | 8.7           | 111.5        |
| <b>HFCO</b>                        | C           | 219.0                | 13.9                    | -29.0         | -19.6         | 184.3        |
|                                    | O           | 106.1                | 6.8                     | -16.0         | -22.1         | 74.8         |
| <b>HCICO</b>                       | C           | 121.0                | 51.7                    | 12.3          | 24.4          | 209.4        |
|                                    | O           | 84.6                 | 21.4                    | 7.4           | -4.3          | 109.2        |
| <b>HBrCO</b>                       | C           | 102.6                | 76.5                    | 24.4          | 38.7          | 242.2        |
|                                    | O           | 79.8                 | 33.6                    | 17.7          | 2.8           | 133.8        |
| <b>HCOOH</b>                       | C           | 246.9                | 14.0                    | -36.9         | -12.1         | 211.9        |
|                                    | O           | 114.4                | 6.7                     | -19.0         | -10.4         | 91.7         |
| <b>H<sub>2</sub>CO<sub>3</sub></b> | C           | 513.6                | 21.5                    | -120.3        | -91.2         | 323.7        |
|                                    | O           | 154.2                | 2.4                     | -36.1         | -9.9          | 110.6        |
| <b>CH<sub>3</sub>COOH</b>          | C           | 247.0                | 8.7                     | -45.7         | -23.5         | 186.4        |
|                                    | O           | 110.6                | 3.3                     | -19.4         | -10.2         | 84.3         |
| <b>Acetone</b>                     | C           | 101.6                | 0.1                     | -7.6          | 0.6           | 94.6         |
|                                    | O           | 70.9                 | 0.9                     | -5.3          | -11.8         | 54.7         |
| <b>Acetaldehyde</b>                | C           | 99.1                 | -0.3                    | -5.9          | 4.7           | 97.6         |
|                                    | O           | 69.1                 | 1.0                     | -4.6          | -10.8         | 54.7         |
| <b>Formaldehyde</b>                | C           | 90.9                 | 3.5                     | -24.9         | -12.8         | 56.7         |
|                                    | O           | 64.6                 | 4.7                     | -17.7         | -17.2         | 34.4         |
| <b>Glycolaldehyde</b>              | C           | 91.4                 | 0.5                     | -10.6         | -4.2          | 77.2         |
|                                    | O           | 66.3                 | 2.1                     | -8.3          | -13.5         | 46.7         |
| <b>Glyoxal</b>                     | C           | 183.0                | 11.7                    | -52.7         | -42.3         | 99.6         |
|                                    | O           | 146.5                | 13.5                    | -42.5         | -45.6         | 71.8         |
| <b>Methylglyoxal</b>               | C           | 182.5                | 10.3                    | -47.2         | -37.0         | 108.6        |
|                                    | O           | 143.5                | 11.0                    | -37.2         | -42.5         | 74.9         |
| <b>Diacetyl</b>                    | C           | 185.9                | 11.2                    | -40.8         | -32.7         | 123.7        |
|                                    | O           | 142.4                | 10.3                    | -32.4         | -39.8         | 80.4         |

**Table S5.** Dynamic atomic contributions to the carbonyl stretch infrared intensities (in  $\text{km mol}^{-1}$ ) calculated in different levels of theory.

| Molecule          | Method | Basis set            | C     | O    | Subst. | % C  | % O  | %(C+O) |
|-------------------|--------|----------------------|-------|------|--------|------|------|--------|
| CO                | B3LYP  | cc-pVDZ              | 41.3  | 31.0 | –      | 57.1 | 42.9 | 100.0  |
|                   |        | cc-pVTZ              | 42.7  | 32.0 | –      | 57.1 | 42.9 | 100.0  |
|                   |        | cc-pVQZ <sup>g</sup> | 43.8  | 32.9 | –      | 57.1 | 42.9 | 100.0  |
|                   | M06-2X | cc-pVDZ              | 51.0  | 38.2 | –      | 57.1 | 42.9 | 100.0  |
|                   |        | cc-pVTZ              | 53.2  | 39.9 | –      | 57.1 | 42.9 | 100.0  |
|                   |        | cc-pVQZ <sup>g</sup> | 54.2  | 40.7 | –      | 57.1 | 42.9 | 100.0  |
|                   | PBE0   | cc-pVDZ              | 44.7  | 33.6 | –      | 57.1 | 42.9 | 100.0  |
|                   |        | cc-pVTZ              | 44.6  | 33.4 | –      | 57.1 | 42.9 | 100.0  |
|                   |        | cc-pVQZ <sup>g</sup> | 45.4  | 34.0 | –      | 57.1 | 42.9 | 100.0  |
|                   | MP2    | cc-pVDZ              | 15.7  | 11.8 | –      | 57.1 | 42.9 | 100.0  |
|                   |        | cc-pVTZ              | 18.2  | 13.6 | –      | 57.1 | 42.9 | 100.0  |
|                   |        | cc-pVQZ <sup>g</sup> | 19.6  | 14.7 | –      | 57.1 | 42.9 | 100.0  |
|                   | QCISD  | cc-pVDZ              | 35.6  | 26.7 | –      | 57.1 | 42.9 | 100.0  |
|                   |        | cc-pVTZ              | 38.4  | 28.8 | –      | 57.1 | 42.9 | 100.0  |
|                   |        | cc-pVQZ <sup>g</sup> | 40.2  | 30.1 | –      | 57.1 | 42.9 | 100.0  |
| H <sub>2</sub> CO | B3LYP  | cc-pVDZ              | 73.2  | 45.5 | –9.8   | 67.2 | 41.8 | 109.0  |
|                   |        | cc-pVTZ              | 73.1  | 45.4 | –11.4  | 68.3 | 42.4 | 110.7  |
|                   |        | cc-pVQZ <sup>g</sup> | 75.7  | 47.2 | –11.9  | 68.1 | 42.5 | 110.7  |
|                   | M06-2X | cc-pVDZ              | 75.4  | 49.5 | –9.9   | 65.6 | 43.0 | 108.6  |
|                   |        | cc-pVTZ              | 75.0  | 49.5 | –11.4  | 66.3 | 43.8 | 110.1  |
|                   |        | cc-pVQZ <sup>g</sup> | 78.7  | 51.9 | –12.1  | 66.4 | 43.8 | 110.2  |
|                   | PBE0   | cc-pVDZ              | 75.1  | 48.0 | –10.2  | 66.5 | 42.5 | 109.0  |
|                   |        | cc-pVTZ              | 73.4  | 47.1 | –11.9  | 67.6 | 43.4 | 110.9  |
|                   |        | cc-pVQZ <sup>g</sup> | 75.6  | 48.7 | –12.3  | 67.5 | 43.5 | 111.0  |
|                   | MP2    | cc-pVDZ              | 48.2  | 26.0 | –6.0   | 70.7 | 38.2 | 108.8  |
|                   |        | cc-pVTZ              | 45.1  | 25.4 | –8.3   | 72.5 | 40.8 | 113.3  |
|                   |        | cc-pVQZ <sup>g</sup> | 47.4  | 27.2 | –9.0   | 72.3 | 41.4 | 113.7  |
|                   | QCISD  | cc-pVDZ              | 60.0  | 34.8 | –7.6   | 68.8 | 39.8 | 108.7  |
|                   |        | cc-pVTZ              | 56.8  | 34.4 | –9.9   | 69.9 | 42.3 | 112.2  |
|                   |        | cc-pVQZ <sup>g</sup> | 59.4  | 36.5 | –10.5  | 69.6 | 42.8 | 112.3  |
| HFCO              | B3LYP  | cc-pVDZ              | 183.4 | 78.9 | –0.8   | 70.1 | 30.2 | 100.3  |
|                   |        | cc-pVTZ              | 189.4 | 83.6 | –1.9   | 69.9 | 30.8 | 100.7  |
|                   |        | cc-pVQZ <sup>g</sup> | 194.5 | 86.8 | –2.1   | 69.7 | 31.1 | 100.7  |
|                   | M06-2X | cc-pVDZ              | 205.7 | 88.6 | 0.4    | 69.8 | 30.1 | 99.9   |
|                   |        | cc-pVTZ              | 209.3 | 92.3 | –0.4   | 69.5 | 30.6 | 100.1  |
|                   |        | cc-pVQZ <sup>g</sup> | 212.8 | 94.8 | –0.9   | 69.4 | 30.9 | 100.3  |
|                   | PBE0   | cc-pVDZ              | 194.5 | 83.2 | 0.1    | 70.0 | 29.9 | 100.0  |
|                   |        | cc-pVTZ              | 193.3 | 83.7 | –0.9   | 70.0 | 30.3 | 100.3  |
|                   |        | cc-pVQZ <sup>g</sup> | 199.1 | 87.9 | –1.1   | 69.6 | 30.8 | 100.4  |
|                   | MP2    | cc-pVDZ              | 164.8 | 60.3 | 1.4    | 72.8 | 26.6 | 99.4   |
|                   |        | cc-pVTZ              | 168.7 | 65.0 | 0.2    | 72.2 | 27.8 | 99.9   |
|                   |        | cc-pVQZ <sup>g</sup> | 173.7 | 69.1 | –0.6   | 71.7 | 28.5 | 100.2  |
|                   | QCISD  | cc-pVDZ              | 179.4 | 69.7 | 1.8    | 71.5 | 27.8 | 99.3   |
|                   |        | cc-pVTZ              | 184.5 | 74.9 | 1.0    | 70.9 | 28.8 | 99.6   |
|                   |        | cc-pVQZ <sup>g</sup> | 188.7 | 78.5 | 0.6    | 70.5 | 29.3 | 99.8   |
